# Supplementary material
Source: MDPI journal article supplement (https://www.mdpi.com/2311-553X/7/3/56)
Supplement: s1 [file s1]

|                                                                           |                            |
|---------------------------------------------------------------------------|----------------------------|
| Query= identified_RefSeq ID                                               | database used (+NCBI)      |
| Sbjct= candidate as used in Table S1                                      | Software(s) used           |
| Experimental validation                                                   | Host gene of the candidate |
| Alignment/sequence identified                                             |                            |
| H/ACA or C/D boxes as defined in database(s) or identified by software(s) |                            |
| Comments                                                                  |                            |

|                             |              |                |
|-----------------------------|--------------|----------------|
| Query= SCARNA21_NR_003000.1 | Length = 138 | snoRNA-LBME-db |
| Sbjct= #4                   | Length = 146 | Blast          |
| IP COIL                     |              | DNAJC16        |

```
Query:   1      ggctcgatttccctggggttggtctcagcccactccacc tccccctcag ccgagcctagag    60
          ||||| |  |||||||  |||||  |||||  |||||  |||||  |||||  |||||  |||||  |||||  |||||  |||||  |||||  |||||  |||||
Sbjct:   8      ggctcggtttccctggggttggtgggtcagtctacaccacc tccccctcag ccaagcctacag    67

Query:  61      tagagggggccaggcatcctccc -caggggaggggcgttgaagcaaggagcctctcctggg    119
           |||||  |||||  |||||  |||||  |||||  |||||  |||||  |||||  |||||  |||||  |||||  |||||  |||||  |||||
Sbjct:  68      tagaggggcccaggcatcctcccgtatgggagaggcgtttgagtaaggagcctcacctggg    127

Query:  120     ctgtcctagcctcacattt    138
              |||||  |||||  |||||  |||||
Sbjct:  128     gtgtcctagcctcacattt    146
```

Query= SNHG3\_HG491818.1 Length = 185  
Sbjct= #8 Length = 206 Blast  
IP DYSK, FIB, COIL and Nucleolar localization SNHG3

```
Query: 99   tttgcttatcagctctttgtcaatgatttctgtaatggaaataggattgaagagactttt 158
          |||
Sbjct: 1    tttgcttatcagctctttgtcaatgatttctgtaatggaaataggattgaagagactttt 60

Query: 159  attctagttggtcaggatttacctctg 185
          |||
Sbjct: 61  attctagttggtcaggatttacctctg 87
```

no box defined yet

Query= SNORA73B\_NR\_004404.2      Length = 205      snoSeeker  
Sbjct= #9      Length = 296      Blast  
SNHG3

```

Query: 1      tccaacgtggataccctgggaggtcactctcccaggctctgtccaagtggcatagggga 60
             |||||||
Sbjct: 25     tccaacgtggataccctgggaggtcactctcccaggctctgtccaagtggcatagggga 84

Query: 61     gcttagggctctgccccatgatgtacagtccctttccacaacgttgaagatgaagctggg 120
             |||||||
Sbjct: 85     gcttagggctctgccccatgatgtacagtccctttccacaacgttgaagatgaagctggg 144

Query: 121    cctcgtgtctgcgcctgcatattcctacagcttcccagagtctgtggacaatgactggg 180
             |||||||
Sbjct: 145    cctcgtgtctgcgcctgcatattcctacagcttcccagagtctgtggacaatgactggg 204

Query: 181    gagacaaaccatgcaggaaacatat 205
             |||||||
Sbjct: 205    gagacaaaccatgcaggaaacatat 229

```

Query= SNORA63C\_NR\_145725.1      Length = 131      snoRNA-LBME-db  
 Sbjct= #12      Length = 231      Blast

# OSCP1

Query: 1 aagcaggattcagactacaatatagctgttaagtgctgtattgtcattccccctgctcaa 60  
 |||||  
 Sbjct: 211 aagcaggattcagactacaatatagctgttaagtgctgtattgtcattccccctgctcaa 152

Query: 61 attaaagtgttttcttaactatacccatctgctattctgtagcagccagggatgcttggt 120  
 |||||  
 Sbjct: 151 attaaagtgttttcttaactatacccatctgctattctgtagcagccagggatgcttggt 92

Query: 121 cacatacatgt 131  
 |||||  
 Sbjct: 91 cacatacatgt 81

-----  
**Query=** SNORD145\_NR\_145816.1 Length = 100 snoSeeker  
**Sbjct=** #13 Length = 108 Blast  
 TMEM53

Query: 1 accagggcctgggagggatgatgtaccaagtgagctgaatggaatcacttggcagcactg 60  
 |||||  
 Sbjct: 105 accagggcctgggagggatgatgtaccaagtgagctgaatggaatcacttggcagcactg 46

Query: 61 taggcccaagccagagctgctctgacatcccaggcccagg 100  
 |||||  
 Sbjct: 45 taggcccaagccagagctgctctgacatcccaggcccagg 6

-----  
**Query=** SNORD160\_NR\_145793.1 Length = 73 snoSeeker  
**Sbjct=** #14 Length = 108 Blast  
 KIF2C

Query: 1 gggcagtgatgagaggggaggaggctctggggcctcagggcctactgtataactcctctgt 60  
 |||||  
 Sbjct: 22 gggcagtgatgagaggggaggaggctctggggcctcagggcctactgtataactcctctgt 81

Query: 61 gactctgaacctg 73  
 |||||  
 Sbjct: 82 gactctgaacctg 94

-----  
**Query=** SNORA26\_NR\_003016.1 Length = 122 snoRNA-LBME-db  
**Sbjct=** #15 Length = 141 Blast  
 OSBPL9

Query: 1 gtgcccttttaaggttgaccagtgctttaagaggctaacacagaagggtaaagtaagtc 60  
 |||||  
 Sbjct: 129 gtgcccttttaaggttgacgcagtgctttaaggggctaacacagaagggtaaaggaagtc 70

Query: 61 tccataaaacccaagagaagagactggaaagctcctctttggatcctgtctggagtcaca 119  
 |||||  
 Sbjct: 69 tccataaaacccaagagaagagattgtaaagctcctcttttagaacctttctggagtcaca 11

-----  
**Query=** SNORA58\_NR\_002985.2 Length = 236 snoRNA-LBME-db  
**Sbjct=** #16 Length = 140 Blast  
 IP\_DYSK NDC1

Query: 1 gggcatactcgtagacccttgccctgactgtgctcatgtccaggcagggggacagtgatg 60  
 |||||  
 Sbjct: 139 gggcatacccgtagacccttgccctgactgtgctcatgtccaggcagggggacattgtatt 80

Query: 61 caagataatttgagttcctgccagctctaaccagcttcacagtggtggataaattg 120  
 |||||

Sbjct: 79 cg<sup>aga</sup>attaatttgaagttcctgccagctttatccagcttaatcagtggtggataaatag 20  
Query: 121 caggact 127  
|||||||  
Sbjct: 19 caggact 13

-----  
**Query=** SNORA44\_NR\_002976.1 Length = 132 snoRNA-LBME-db  
**Sbjct=** #23 Length = 100 [Blast](#)  
CGN

Query: 33 gccatgggatctccaactgcatgcaagagcaacctggaaaga<sup>ctttgac</sup>agcgcaggtca 92  
|||||||  
Sbjct: 93 gccatgggatctccaactgcatgcaagagcaacctggagaga<sup>ctttgac</sup>agaacaggtca 34

Query: 93 gtacaatacctgcaagct<sup>gccact</sup> 116  
| |||||  
Sbjct: 33 gcacaatccctgc-agct<sup>gccact</sup> 11

-----  
**Query=** SNORD64\_NR\_001294.1 Length = 67 snoSeeker  
**Sbjct=** #25 Length = 67 [Blast](#)  
Clorf204

Query: 1 ggattt<sup>gtgatgag</sup>ctgtgtttactgagc<sup>atgatga</sup>agtaaagctcaacgtgattactct 60  
|||||||  
Sbjct: 67 ggattt<sup>ataatgag</sup>ctgtgtttactgagc<sup>attatga</sup>agtaaagttcaatatgattactct 8

Query: 61 ga<sup>agtc</sup> 66  
||  
Sbjct: 7 ga<sup>agtc</sup> 2

-----  
**Query=** SNORA67\_NR\_002912.1 Length = 137 snoRNA-LBME-db  
**Sbjct=** #26 Length = 145 [SnoReport/Blast](#)  
**IP DYSK and Nucleolar localization** ABL2

Query: 1 atccaaggtgat<sup>tccctc</sup>tccaagggga-catc-agtgcc--tctcagg<sup>aaagtag</sup>cagc 56  
|||||||  
Sbjct: 2 atccaaggtgat<sup>tccctc</sup>tccaaggggaacatccagtgccctctcagg<sup>aaagtag</sup>caac 61

Query: 57 ttgga<sup>ataga</sup>aatctggcatgcctaaggcctttggggaactgggatgcttatttcctctgc 116  
|||||  
Sbjct: 62 ctgga<sup>aca</sup>aatctggcatgcctaaggcatttggggaacagggctgggttatttcctctgc 121

Query: 117 cttccttggctgcccacatgg 137  
|||||||  
Sbjct: 122 cttccttggctgcctacatgg 142

-----  
**Query=** SNORA72\_NR\_002581.1 Length = 132 snoRNA-LBME-db  
**Sbjct=** #28 Length = 135 [Blast](#)  
NUCKS1

Query: 7 at<sup>attctcgct</sup>gttctgattttgtaatagtcaggac<sup>aggcta</sup>aacattcgct<sup>ata</sup>attaag 66  
||  
Sbjct: 128 at<sup>attctcact</sup>gttttgattttgtaatagtcaggac<sup>aggcta</sup>accattcact<sup>tta</sup>attaag 69

Query: 67 accatgcatgtgtccccaacctaagttccttcctaggtctggtttcataaatgctggtg 126  
|||||||  
Sbjct: 68 accatgcatatatcccagaactagttccttcctgaggtctagttttataaatggtgctg 9

Query: 127 ataaac 132  
|||||

Sbjct= #41                  Length = 158                  SnoReport



```

Query: 1   gcaagcctccagcgtgcttgggtctgcagtgaccccgtagttcctacagggcttgccag 60
          ||||| ||||| ||||| ||||| ||||| ||||| ||||| ||||| |||||
Sbjct: 16  gcaagcctccagcgtgcttgggtctgcagtgaccccgtagttcctacagggcttgccag 75

Query: 61  aacagttttgaaatggtttgaggccttgccgtgctccatgtagagcaaggttatagaaat 120
          ||||| ||||| ||||| ||||| ||||| ||||| ||||| |||||
Sbjct: 76  aacagttttgaaatggtttgaggccttgccgtgctccatgtagagcaaggttatagaaat 135

Query: 121 ttcagacaatg 131
          ||||| |||||
Sbjct: 136 ttcagacaatg 146

```

-----  
**Sbjct= #64** Length = 120 [SnoReport](#)  
 ULK1

C=11 D=58 22 93 ATGATGA 32 CTGA 79 0.71 C/D box snoRNA  
 CATGAGTAGGGTTGCAGGGTGATGGCCCCACATGATGATGGCACTCCTTGTGTGACATGGGAGGGGTCTGCAGAGCACCT  
 GAGTCGGCCATGAACCCCGTCCCTCTGTCCATCTGACTG

-----  
**Query= SNORA101B\_NR\_135620.1** Length = 132 [snoSeeker](#)  
**Sbjct= #68** Length = 197 [Blast](#)  
 RALGAPA1

```

Query: 1   tctcttttatatgcccttctgatcccaagtatggcagaaggatataaagggtcaccaagaa 60
          ||||| ||||| ||||| ||||| ||||| ||||| ||||| |||||
Sbjct: 164 tctcttttatatgcccttctgatcccaagtatggcagaaggatataaagggtcaccaagaa 105

Query: 61  taatttgaggttgccaaggacttattttaaagtgttttcaagtccgaccgagaactctg 120
          ||||| ||||| ||||| ||||| ||||| ||||| ||||| |||||
Sbjct: 104 taatttgaggttgccaaggacttattttaaagtgttttcaagtccgaccgagaactctg 45

Query: 121 acatttacaat 132
          ||||| |||||
Sbjct: 44  acatttacaat 33

```

-----  
**Query= SNORD58B\_NR\_002572.1** Length = 66 [snoRNA-LBME-db](#)  
**Sbjct= #69** Length = 81 [Blast](#)  
 PRPF39

```

Query: 5   gatgatggcatttcttaggacaccttgggattaataatgaaaacaactactctctgagca 64
          ||||| ||||| ||||| ||||| ||||| ||||| ||||| |||||
Sbjct: 11  gatgatggcatttcttaggacaatttgggattaattatgaaaacaactactctctgagca 70

```

-----  
**Query= SNORD115-21\_NR\_003313.1** Length = 81 [snoSeeker](#)  
**Sbjct= #75** Length = 147 [SnoReport/Blast](#)  
 SNORD115-15

```

Query: 1   gggtcgatgatgagaaccttatattttctgaagagaggatgatgacttaaaaaatcatgctc 60
          ||||| ||||| ||||| ||||| ||||| ||||| ||||| |||||
Sbjct: 22  gggtcgatgatgagaaccttatattttctgaagagaggatgatgacttaaaaaatcatgctc 81

Query: 61  aataggattacgctgaggccc 81
          ||||| |||||
Sbjct: 82  aataggattacgctgaggccc 102

```

-----  
**Sbjct= #80** Length = 170 [SnoReport](#)  
 IP DYSK and Nucleolar localization THBS1



Sbjct: 129 aacacacgggtcatcagggttccctcagactggtgccctctgttggcaccatctctgag 70

Query: 121 ccccatggggccacatgtgggcaggacctggaaagaaccttggctgcagagga**ctgagggg** 180  
|||||

Sbjct: 69 ccccatggggccacatgtgggcaggacctggaaagaaccttggctgcagagga**ctgagggg** 10

Query: 181 g 181

|  
Sbjct: 9 g 9

-----  
**Query= SNORA81\_NR\_002989.1** Length = 178 snoRNA-LBME-db  
**Sbjct= #114** Length = 126 [Blast](#)  
MIB1

Query: 3 cttcttgtata**aagcactgt**gctaaaattgcagacactaggaccatgtcttgggtttttgca 62  
|||||

Sbjct: 123 cttcttgtata**aagcactgt**gctaaaatcgagaaactaggaccatatcttgggtttttgtg 64

Query: 63 ataatgcttgc**agagtacac**acaagaag**aaa**agtaacagcactagattgtaaagactggg 122  
|||||

Sbjct: 63 ataatgctagc**agagtacac**agaagaat**aaa**cgtaacagcattggattataaagactagg 4

Query: 123 gtg 125

|||  
Sbjct: 3 gtg 1

-----  
**Sbjct= #118** Length = 76 [SnoReport](#)  
NFIC

C=11 D=50 7 70 TTGATGT 17 CTGA 56 0.68 C/D box snoRNA  
AGCGTTCATGTTACG**TTGATGT**TCATAGTCACGTACATGTT**CTGA**GTGAGCATGGCCGGGGT

-----  
**Query= SNORD135\_NR\_132756.1** Length = 75 snoSeeker  
**Sbjct= #122** Length = 131 [Blast](#)  
TNPO2

Query: 1 gcctcaag**tgatgg**agagcaatacccggggatgactgtgaccacattgggatgtattcgt 60  
|||||

Sbjct: 111 gcctcaag**tgatgg**agagcaatacccggggatgactgtgaccacattgggatgtattcgt 52

Query: 61 actgt**ctga**tggggc 75

|||||  
Sbjct: 51 actgt**ctga**tggggc 37

-----  
**Query= SNORA68B\_NR\_145718.1** Length = 133 snoSeeker  
**Sbjct= #124** Length = 144 [Blast](#)  
ANKRD27

Query: 1 ttctcacctaaacccaagaatcactgtttcttatagcggtggtttaaacagaggtgcaaa 60  
|||||

Sbjct: 141 ttctcacctaaacccaagaatcactgtttcttatagcggtggtttaaacagaggtgcaaa 82

Query: 61 **cagca**agtgaatctcgtcgcctttgcggggctgtggccatgccctcaaaggaaatttg 120  
|||||

Sbjct: 81 **cagca**agtgaatctcgtcgcctttgcggggctgtggccatgccctcaaaggaaatttg 22

Query: 121 aggtctt**acag**cc 133

|||||  
Sbjct: 21 aggtctt**acag**cc 9



-----  
Query= SNORA2A\_NR\_002950.1 Length = 135 snoRNA-LBME-db  
Sbjct= #127 Length = 136 Blast  
C2orf48

Query: 1 taggcctgaatcaagaccaatggttctgttagctgttggtttcaaacaggagctaaga 60  
|||||||  
Sbjct: 135 taggcctgaatcaagactagtgttctgttagctgttggtttcaaacaggatccgaga 76  
Query: 61 gtgatgtcttcc ttgtggctctgttggctattcagattccagtgccaatttcag 120  
|||||||  
Sbjct: 75 gtgatgtcttcc ttgtggctctgttcactgctcagtatccagtgctcagtgggccaatttcag 16  
Query: 121 ttggaagaaacat 133  
|||||||  
Sbjct: 15 ttggaagcaacat 3

-----  
Sbjct= #130 Length = 100 SnoReport  
DYSF

C=11 D=61 14 88 ATGAGGA 24 CTGA 74 0.90 C/D box snoRNA  
AAAGAGAAAGGCCAAAGTGAGCCATGAGGATGCCTTTGTGAATGCCAGAGGACATTACCTCTGTTGTTTGGAACTGAGCT  
CTCTCTCCACCTAGGTGGTT

-----  
Query= SNORA40B\_NR\_145723.1 Length = 128 snoRNA-LBME-db  
Sbjct= #135 Length = 192 SnoReport/Blast  
RAB3GAP1

Query: 1 tgcacttatgtatgtttttgtttaactgtggacaaagacttatggataggtgcaaaaaa 60  
|||||||  
Sbjct: 37 tgcacttatgtatgtttttgtttaactgtggacaaagacttatggataggtgcaaaaaa 96  
Query: 61 taaatcctct tttgcaaccagaaactcattgttcagtatgagtt ttgatacatataagaa 120  
|||||||  
Sbjct: 97 taaatcctct tttgcaaccagaaactcattgttcagtatgagtt ttgatacatataagaa 156  
Query: 121 gggatatt 128  
|||  
Sbjct: 157 gggatatt 164

-----  
Query= SCARNA16\_NR\_003013.1 Length = 187 snoRNA-LBME-db  
Sbjct= #138 Length = 182 Blast  
IP COIL CCDC150

Query: 4 gtctggggaaaggctcctgtgttgttgagcctgccaaagtgtgggtgcagcatggtacca 63  
|||||||  
Sbjct: 179 gtctgtggaaaggctactgtgttgttgaactgccagctgtgggtgcagccatgtacca 120  
Query: 64 ggcagcccaaccctgacctaaagtaaattcccgaagaagtctttcctgggttttgaatt 123  
|||||||  
Sbjct: 119 ggcagcccaagcctgacataaagtaaattcccaggagaagtctttcctgggttttgaatt 60  
Query: 124 tgcagtaa caggtgtgagcattctagcagcagtttgatgatc atgtatgatactgcaaaca 183  
|||||||  
Sbjct: 59 tgcagtaa caggtgtgaagcattccagcagcagtttgatgatc atgttggaagcaacatgg 1

-----  
Query= SNORA26\_NR\_003016.1 Length = 122 snoRNA-LBME-db  
Sbjct= #144 Length = 79 Blast  
PCNA

Query: 4 cccttttaagggtgacccagtgcctttaagaggctaacacagaagggtaaag-taagtctc 62  
|||||  
Sbjct: 65 cccttttaagggtgacccagtgcctttaagaggctgatacagaagggtaaagttaagtctc 6

Query: 63 ca 64  
||  
Sbjct: 5 ca 4

Partial sequence; lack of ACA

-----  
**Query=** SNORD83A\_NR\_000028.1 Length = 75 snoRNA-LBME-db  
**Sbjct=** #160 Length = 215 [Blast](#)  
RPL3

Query 1 gctgttcagtgatgaggcctggaatgtgcgctgggcacagcgcccgagacagactgcgga 60  
|||||  
Sbjct 181 gctgttcagtgatgaggcctggaatgtgcgctgggcacagcgcccgagacagactgcgga 122

Query 61 accgttccttggtgccttccttctgagaacagc 93  
|||||  
Sbjct 121 accgttccttggtgccttccttctgagaacagc 89

Partial sequence; no box found

-----  
**Query=** SNORD83A\_NR\_000027.1 Length = 95 snoSeeker  
**Sbjct=** #161 Length = 159 [Blast](#)  
RPL3

Query: 1 gctgttcgttgatgaggctcagagtgcgctgggtacagcgccgaatcggacagtgtga 60  
|||||  
Sbjct: 129 gctgttcgttgatgaggctcagagtgcgctgggtacagcgccgaatcggacagtgtga 70

Query: 61 gaaccattctctactgccttccttctgagaacagc 95  
|||  
Sbjct: 69 gaaccattctctactgccttccttctgagaacagc 35

-----  
**Query=** SNORD146\_NR\_145791.1 Length = 130 snoSeeker  
**Sbjct=** #166 Length = 142 [Blast](#)  
SMARCC1

Query: 1 tcttatttcaaggctctgtgatgtgtaggagaaaatgtagaaccatagaatttcattatt 60  
|||||  
Sbjct: 137 tcttatttcaaggctctgtgatgtgtaggagaaaatgtagaaccatagaatttcattatt 78

Query: 61 attactatTTTTTgtctcatttagtcctctcatttttctggtatagagggactgagagcc 120  
|||||  
Sbjct: 77 attactatTTTTTgtctcatttagtcctctcatttttctggtatagagggaactgagagcc 18

Query: 121 tgaagagggt 130  
|||||  
Sbjct: 17 tgaagagggt 8

-----  
**Query=** SNORD136\_NR\_132757.1 Length = 147 snoSeeker  
**Sbjct=** #168 Length = 197 [SnoReport/Blast](#)  
GNL3

Query: 1 tgtgagaaatgatgagggtcaacattcttcataccaaagtgaagacatgagatccaactc 60  
|||||  
Sbjct: 20 tgtgagaaatgatgagggtcaacattcttcataccaaagtgaagacatgagatccaactc 79

Query: 61 tga gctcacctgttgctaaatggataatgc cagtactctcttgtggaagggtattaccag 120  
|||

Sbjct: 80 **tgag**ctcacctgttgctaaatg**gataatgc**cagtactctcttgtggaaggtattaccag 139

Query: 121 aacaagggatgtagtt**ctgat**catttt 147

|||||

Sbjct: 140 aacaagggatgtagtt**ctga**catttt 166

-----  
**Sbjct= #171**

Length = 390

[SnoReport](#)  
GPR128

Hpos=59 ACApos=130 51 180 ACAGGA 107 ACA 178 0.83 H/ACA box snoRNA

CAGTTCCTCCGTATTTCTTATTTCAAATATCTTGGTTAGTTCAGCTGTCTGGACTAGCTTATTCTTACTGCCAGCATATA  
TCATTGTGTGTTTCAGGCTTACATCCA**ACAGGA**CTGGAGAAAATAAAGCACGGAGGATATGGAACCTCTCCCATCCATTATG  
TTGATATTTATAACTAT**ACA**CAATGAAACGAGGTTGTCGTTTCAGGTAGTTCATCTTTAAGTTCATCTGGTGAAATACCCT  
CAAGCTCCTCATCCAGTACCACCAGGCGTTTATCCTTCAATCTTCATTACAATAGAAGCATTGTTTGTTCCTTTGTGAAA  
ACGAAACTTTCTCAGCTTTTCCACTAAATCTTCAGCAACATCAAAACCACCAAAGACTCACTCATTTTCCT

-----  
**Query= SNORA5A\_NR\_002919.1**

Length = 134

snoRNA-LBME-db

**Sbjct= #172**

Length = 132

[SnoReport/Blast](#)  
MYLK

Query: 1 tgcagccgt**gtcaaattc**agtacctgtcctatgcatggtaggcact**ggcc**cagaaggctg 60

|||||

Sbjct: 1 tgcagctgt**gtcaaattg**gtgcctgcct-gcctgtgtaggcact**gacc**cagaaggctg 59

Query: 61 cc**acag**aaacactgtgact**tcattggggc**ctgttcctgtgtcccaggctcag**ggataa**attt 120

|||||

Sbjct: 60 cc**acag**aa--aactgact**tcattggggc**ctgttcctgtgtctcgggctcag**ggataa**attt 117

Query: 121 ggtt**acag**acatca- 135

|||||

Sbjct: 118 ggtt**acag**ataccaa 132

-----  
**Sbjct= #173**

Length = 213

[SnoReport](#)  
AMOTL2

Hpos=83 ACApos=156 11 166 AGACAA 91 ACA 164 0.57 H/ACA box snoRNA

GAAACCCAGCTCAGCTCAGGGCCCCATGGGTGGGAGCCTCCTCTGTCAAGAGCCATCATCCCTGAGGGGATCCTAGGCC  
CAGTACATAG**AGACAA**GCATCTCTCTATCAGGGCAGCTCCAAAGGGGTCTCAGCCTGGCTCTCTGAGTTCATCTGCACTT  
TTG**ACA**GAGAATAGAGATTCCCAATTTTCTCTAGAACAAAAGAAGTAAGTCC

-----  
**Query= SNORA18\_NR\_002959.1**

Length = 132

snoRNA-LBME-db

**Sbjct= #175**

Length = 138

[Blast](#)  
LINC00578

Query: 2 ttgaggtctatcccgatggggcttttctgtagcctgcacatcggttgaaacgcctcata 61

|||||

Sbjct: 133 ttgaggtctttcccgatgggacttttc-tgtaggctgcacatcatttgaaacgcctcata 75

Query: 62 **gagt**-aactctgtggttttactttactcacaggactattgtttagatctgtgggaa 115

|||||

Sbjct: 74 **gagtta**aactctgtggttttactttactcacaggactcttgtttagatctgtgggaa 20

[Partial sequence; lack of ACA](#)

-----  
**Query= SNORA63\_NR\_033236.1**

Length = 134

snoRNA-LBME-db

**Sbjct= #176**

Length = 284

[Blast](#)  
LINC00888

Query: 1 gaagcaggattcagactacaatatagctgttttagtgctgtgtgtgcgttccccctgtca 60

| | |||||

Query: 92 gctaaccacaaagggctctctggcccaatgagtggagtttgatagtaattcttgctacaa 145

Sbjct: 62 gctaaccacaaaggtctctggcccaatgagtggagttgataggagttcttgtgacaa 115

-----  
Query= SNORA51\_NR\_002981.1 Length = 132 snoSeeker  
Sbjct= #186 Length = 137 Blast  
DDX60L

Query: 7 ctgggtgcttaccacaggctgtgttcttacactgactgtatagaaaggaggtagagtaa 66  
|||||  
Sbjct: 7 ctgggtgcttaccacaggctgaattcttacactgactatatagaaa-aggaggtagagtaa 65  
Query: 67 acctacccccatatacacctcagctcaggccctgtgcttggtctgtattgtgaatggggga 126  
|||||  
Sbjct: 66 acctacccaatatacccctcagcccaggctctgtgctgatctatattgtgaatgtggga 125  
Query: 127 acatag 132  
|||||  
Sbjct: 126 acatag 131

-----  
Sbjct= #189 Length = 116 SnoReport  
AHRR

C=11 D=75 1 89 GGGATGA 11 CTGA 75 0.72 C/D box snoRNA  
TGTCTGCTGAGGGATGAGGCACTGTTGGAGGTCCTGGGACAGGGGCCTGACCTCCTCAGCCTCTTCTGTGGCTTCTGACA  
GCAGCAGTGGTAATACCGGTAACACATAGTGGTGAT

-----  
Sbjct= #190 Length = 135 SnoReport  
IP FIB and Nucleolar localization TRIO

C=11 D=79 27 119 ATGATGA 37 CTGA 105 0.88 C/D box snoRNA  
CTAATTACTCAGATCAGCCAAGAAGGGTCCAGGATCATGATGAGCCGTGCTCAGGTTACGTTGGTGGTTTTGAAGCTGGG  
CTAGACTTGGAAGTCTGTGCGACACTGAGAATCCATGGAATTTATGAAGACCAGAT

-----  
Query= SNORD170\_NR\_145815.1 Length = 85 snoSeeker  
Sbjct= #191 Length = 100 Blast  
TRIO

Query: 1 ggggcctgcaatgatggctgtgagctgcaggactgagcacagggttgagtcctggagttt 60  
|||||  
Sbjct: 7 ggggcctgcaatgatggctgtgagctgcaggactgagcacagggttgagtcctggagttt 66  
Query: 61 tgtgtgcatctgagggttcaggctcc 85  
|||||  
Sbjct: 67 tgtgtgcatctgagggttcaggctcc 91

-----  
Query= SNORA40\_NR\_002973.1 Length = 127 snoRNA-LBME-db  
Sbjct= #195 Length = 127 Blast  
IP DYSK and Nucleolar localization FAM196A

Query: 8 atgtatgtttttgtttaacgtgga--caaagacttacagataggtgcaaaaaataaatcc 65  
|||||  
Sbjct: 121 atgtatgtttttgtttaacttgatacaaaaggcttatggataggtgcaaaaa-taaattc 63  
Query: 66 tcttttgcaaccaggaaactcattgttcagtgatgagtttgatacatataagaagggatat 125  
|||||  
Sbjct: 62 tcttttgcaaccaggaaactcattgttcagtgatgagtttgatacatataagaagggatat 3  
Query: 126 ta 127  
||  
Sbjct: 2 ta 1

-----  
Query= SNORA109\_NR\_132964.1 Length = 128 snoRNA-LBME-db  
Sbjct= #198 Length = 517 Blast  
IP DYSK and Nucleolar localization DHFR

Query: 14 aaaatatactatgaaagtggctttaataacc-ctgaagacacaatagctaagacccaaact 72  
||||| ||| ||||| ||||| ||| ||||| ||||| ||||| ||||| ||||| ||||| |||||  
Sbjct: 88 aaaataaactacgaaagtggctttaacgcatctgaacacacaatagctaagacccaaact 29  
  
Query: 73 gggattagataccccactatgcttagcc 100  
||||| ||||| ||||| ||||| ||||| ||||| ||||| ||||| ||||| ||||| |||||  
Sbjct: 28 gggattagataccccactatgcttagcc 1

Partial sequence; lack of ACA

-----  
Query= SNORA40\_NR\_002973.1 Length = 127 snoRNA-LBME-db  
Sbjct= #220 Length = 136 SnoReport/Blast  
FKPB5

Query: 13 tgtttttgtttaac--gtggacaaagacttacagataggtgcaaaaaataaatcctcttt 70  
||||| ||||| ||||| ||||| ||||| ||||| ||||| ||||| ||||| ||||| |||||  
Sbjct: 18 tgtttttgtttaacttgtggacaaagacttatggttaggtgcaaaaaataaatcctcttt 77  
  
Query: 71 tgcaaccagaaactcattgttcagtatgagtttgatacataaagaagggtgttgagg 129  
||||| ||||| ||||| ||||| ||||| ||||| ||||| ||||| ||||| ||||| |||||  
Sbjct: 78 tgcaaccagaaactcattgttcagtatgagtttgatacataaagaaggatatta 134

-----  
Query= SNORD45B\_NR\_002748.1 Length = 71 snoRNA-LBME-db  
Sbjct= #221 Length = 76 Blast  
IP FIB and Nucleolar localization BTBD9

Query: 1 ggtcaatgatgtaatggcatgtattagctgaatctaaagttgatgtgagttctagaatta 60  
||||| ||||| ||||| ||||| ||||| ||||| ||||| ||||| ||||| ||||| |||||  
Sbjct: 2 ggtcaatgatgtaatggcatgtattagctgaatccagagttgatatgagttctaaaatta 61  
  
Query: 61 cactga 66  
|||||  
Sbjct: 62 cactga 67

-----  
Query= SNORA8\_NR\_002920.1 Length = 139 snoRNA-LBME-db  
Sbjct= #222 Length = 129 Blast  
USP49

Query: 14 atctgcactcagcagtttacacctgctagggtgttcaaggtcagtgctatagaaattca 73  
||||| ||||| ||||| ||||| ||||| ||||| ||||| ||||| ||||| ||||| |||||  
Sbjct: 1 atctgcactcagtagtttattcctgct-gggtgtccaaagatcagtgccatagaaattca 59  
  
Query: 74 gtatctggcatcggtgttttcttggtttgtgcttggt-aaacctgggtatttctactga 132  
||||| ||||| ||||| ||||| ||||| ||||| ||||| ||||| ||||| ||||| |||||  
Sbjct: 60 gtatctagcatcactgaatttcttggtttgtgcttggttaaaacctgggtatttctattga 119  
  
Query: 133 tacagta 139  
|||||  
Sbjct: 120 cacagta 126

-----  
Query= SCARNA15\_NR\_003011.1 Length = 127 snoRNA-LBME-db  
Sbjct= #224 Length = 128 Blast  
IP COIL and Nucleolar localization XPO5

Query: 5 agactaagaaaatagagtccttgaaatcaagctgactctgcttttagcctcctaaatgaa 64

```

Sbjct: 6      |||
agactaagaaaatagagtccttaaagtcagctgagctctgctgtagcctcctaaatgaa 65

Query: 65      aaggtagatagaacaggtcttgtttgcaaaataaattcaagacctacttatctaccaaca 124
               |||
Sbjct: 66      aggatagacagaacaggtcttgtttgcaaaataaattcaagacctacttatctaccgaca 125

Query: 125      gca 127
               |||
Sbjct: 126      gca 128

```

```

-----
Query= SNORA40_NR_002973.1      Length = 127      snoRNA-LBME-db
Sbjct= #227                      Length = 159      SnoReport/Blast
IP DYSK and Nucleolar localization AMD1

```

```

Query: 1      tgcacttatgtatgtttttgtttaac--gtggacaaagacttacagataggtgcaaaaaa 58
               |||
Sbjct: 4      tgcacttatgtatgtttttgtttaacttgtggacaaagactttaggaaaggtgcaaaaaa 63

Query: 59      taaatcctcttttgcaaccaggaactcattgttcagtatgagtttgatacatataagaa 118
               |||
Sbjct: 64      taaatcctcttttgcaaccaggaactcattgttcagtatgagtttgatacatatcgaa 123

Query: 119      gggata 124
               |||
Sbjct: 124      tggata 129

```

```

-----
Query= SNORA27_NR_002575.1      Length = 126      snoRNA-LBME-db
Sbjct= #228                      Length = 117      Blast
PEX7

```

```

Query: 1      tacccttttctactttgcagttggacttatgtctttattggcattcaagtgggg 57
               |||
Sbjct: 117      ttccactttgccaactggatgtatgtctttactggcattccagtgggg 62

Query: 58      caaaggaaatatcc-ttttaaaactcaggcaaactgggtgtttgtctgtatcctgtc 103
               |||
Sbjct: 61      caaacgaaatatcctttttaaaactcaggcaaactgggtgtttgtcatggcatgta 13

Query: 58      agaggaaacaaat 103
               |
Sbjct: 12      tcctgtcagag 1

```

```

-----
Query= SNORA116_NR_145798.1      Length = 147      snoSeeker
Sbjct= #231                      Length = 158      Blast
TULP4

```

```

Query: 2      ttttctcagtgggtgcaagaagattaagccacattctggcttttagagaggcatttctgaga 61
               |||
Sbjct: 1      ttttctcagtgggtgcaagaagattaagccacattctggcttttagagaggcatttctgaga 60

Query: 62      gagatgaaggacacttcgttccccagccccaacctaagcatgtgactgtactcaccttgt 121
               |||
Sbjct: 61      gagatgaaggacacttcgttccccagccccaacctaagcatgtgactgtactcaccttgt 120

Query: 122      cagatgctgttggaacctggctgaca 147
               |||
Sbjct: 121      cagatgctgttggaacctggctgaca 146

```

```

-----
Query= SNORA80B_NR_028374.1      Length = 136      snoRNA-LBME-db

```

**Sbjct= #232**

Length = 185

[Blast](#)

AIMP2

```
Query: 1   gcatgggtttggatttatgacaggcccgtcaccctgggcctgtcatagtaccccatgcc 60
          |||||
Sbjct: 23  gcatgggtttggatt-atgacaggcccacccccctggacctctcatagtgccccatgcc 81

Query: 61  gagcaaacgtgtgtccccgaaccattgacctggcctctgtgcccgtaggctgctggcactga 120
          |||||
Sbjct: 82  gagcaaacgtgtggccccgaaccattgacctggcctctgtacctgtgggcactggcactga 141

Query: 121 agtgggttgacacagtg 136
          |||||
Sbjct: 142 agagggttacacagtg 157
```

**Query= SNORA20\_NR\_002960.1**

Length = 132

snRNA-LBME-db

**Sbjct= #233**

Length = 150

[Blast](#)

POU6F2

```
Query: 1   cttcccatTTTgctgctttagtctcacagtgatacgagcagttatacgcatgggat 60
          |||||
Sbjct: 147 cttcccatTTTgctgctttagtctcactgtgatatgagcaattatacacatgggat 88

Query: 61  aaaataacattgggccactgtaaattgagatgaagtaaccattttcatctcttctgcagg 120
          |||||
Sbjct: 87  aaaataatattgagccactgtaaattgagatgaagtaaccgttttcatactcttctgcatg 28

Query: 121 gactagacattg 132
          |||||
Sbjct: 27  gactagacattg 16
```

**Query= SNORA15\_NR\_002957.1**

Length = 133

snRNA-LBME-db

**Sbjct= #235**

Length = 205

[Blast](#)

CCT6P3

```
Query: 1   gcatggccgaatactgtgtt--tttatcagtagtttacacagccagacaccatgcaaaaag 58
          |||||
Sbjct: 4   gcatggctgaatactgtgttcttttatcagtagtttacacagccagacaccatgcaaaaag 63

Query: 59  cagtcttccctttagaatgactgatggtagtaagggtttttcatagcatatcattatta 118
          |||||
Sbjct: 64  cagtcttccctttagaatgactgatggtagtaagggtttttcatagcatatcattatta 123

Query: 119 aagtgaaatacaaat 133
          |||||
Sbjct: 124 aagtgaaatacaaat 138
```

**Query= SNORA15\_NR\_002957.1**

Length = 133

snRNA-LBME-db

**Sbjct= #236**

Length = 206

[Blast](#)

CCT6P1

```
Query: 1   gcatggccgaatactgtgtt--tttatcagtagtttacacagccagacaccatgcaaaaag 58
          |||||
Sbjct: 4   gcatggctgaatactgtgttcttttatcagtagtttacacagccagacaccatgcaaaaag 63

Query: 59  cagtcttccctttagaatgactgatggtagtaagggtttttcatagcatatcattatta 118
          |||||
Sbjct: 64  cagtcttccctttagaatgactgatggtagtaagggtttttcatagcatatcattatta 123

Query: 119 aagtgaaatacaaat 133
          |||||
```



Query= SNORA1\_NR\_003026.1      Length = 130      snoRNA-LBME-db  
Sbjct= #244      Length = 164      Blast  
LYN

Query= SNORD168\_NR\_145799.1      Length = 58      snoSeeker  
Sbjct= #245      Length = 61      Blast  
EXT1

Query= SNORA12\_NR\_002954.1      Length = 147      snoRNA-LBME-db  
Sbjct= #246      Length = 121      Blast  
ASAP1

Partial sequence; lack of ACA

Query= SNORD149\_NR\_145785.1      Length = 64      snoSeeker  
Sbjct= #247      Length = 142      Blast  
ZC3H3

Query= SNORA51\_NR\_002981.1 Length = 132 snoRNA-LBME-db  
Sbjct= #259 Length = 63 Blast  
ZNF41

Partial sequence; out of range

Query= SCARNA27\_NR\_003703.1      Length = 126      snoRNA-LBME-db  
Sbjct= #261      Length = 132      Blast

## KIAA2022

Query= SNORA40\_NR\_002973.1 Length = 127 snoRNA-LBME-db  
Sbjct= #271 Length = 126 Blast

Query= SNORA70B\_NR\_003707.2      Length = 134      snoSeeker  
Sbjct= #275      Length = 181      SnoReport/Blast  
IP\_DYSK

Query= SNORA72\_NR\_002581.1 Length = 132 snoRNA-LBME-db  
Sbjct= #277 Length = 120 Blast

Query= SNORA40\_NR\_002973.1      Length = 127      snoRNA-LBME-db  
Sbjct= #281      Length = 167      [SnoReport/Blast](#)

```
Query: 1   tgcacttatgtatgtttttgtttaac--gtggacaaagacttacagataggtgcaaaaaa 58
          ||||| ||||| ||||| ||||| ||||| ||||| ||||| ||||| ||||| |||||
Sbjct: 12  tgcacttctgtatgtttttgtttaacttgtggacaaagacttgtggataggtgcaaaaaa 71

Query: 59   taaatcctcttttgcaaccagaactcattgttcagtatgagttttgatacatataagaa 118
          ||| ||||| ||||| ||||| ||||| ||||| ||||| ||||| ||||| |||||
Sbjct: 72   taagtccctcttttgcaacctggaactcattgttcagtatgagttttgatacatataagaa 131
```

```
Query: 119 gggatatta 127
      ||| ||| |||
Sbjct: 132 gggatatta 140
```

Query= SNORD2\_NR\_002587.1 Length = 70 snoSeeker  
Sbjct= #282 Length = 137 Blast

Query: 4 tgaaatgatggcaatcatcttttcggaactgacctgaaatatgaagagaatactcattgtcta 63  
||| ||||| | | | | | | | | | | | | | | | |  
Sbjct: 135 tgaattgatgacagtcatcttttgagagtgaacccaaaatgaaaaa gaatactcattgtcta 76

```
Query:  64   tcacttg 70
        |||||
Sbjct:  75   tcacttg 69
```

Query= SNORD88C\_NR\_003069.1 Length = 97 snoRNA-LBME-db  
Sbjct= #285 Length = 84 Blast

## IP FIB and Nucleolar localization

Query 10 ccatgatgtccagcactgggctctgaatcacccctgaggacacagtgcaccccaggacctt 69  
| | | | | | | | | | | | | | | | | | | | | | | | | | | | | | | | |  
Sbjct 5 ccatgatgtccagcactgggctctgaatcactcggaggacacagttttccccaagaccat 64

```

Query    70  tgacacctgggggtctgag  88
      |  |||||  |||||
Sbjct    65  ggctacctggggatctgag  83

```

Query= SNORA3B\_NR\_002977.1 Length = 131 snoRNA-LBME-db  
Sbjct= #289 Length = 95 Blast

Query: 7 actagaggtcacatcctgacacaactcttgctcctggtgtgctagagtactcgaagagaatc 66  
 |||  
 Sbjct: 87 actagagtaacatcctgacacagctcttgctcctggtgtgctagagttctcga--tgaatc 30

```
Query: 67 tactggtcttgattcactgg 86
      |||||
Sbjct: 29 tactggtcttgattcactgg 10
```

no box defined yet

Query= SNORA38B\_NR\_003706.2 Length = 132 snoSeeker  
Sbjct= #290 Length = 133 Blast

Query: 1 cctcctacaaaggcatgtctatagttccttgctcttggacatgtaagaattggaggc **aaa** 60  
 |||  
 Sbjct: 130 cctcctacaaaggcatgtctataattccttgctcttggacatgtaagaattggaggg **aca** 71

Query: 61 gaaatgtggacttggagaaatctggggccagcttgctctccgcaggctcaagatcaacca 120  
||| |||||||||||||||||||||||||||| | ||||||||  
Sbjct: 70 gaaatgtggacttggagaaatctggggccagctttctcatcacaggctcaacatcaacca 11

```
Query: 121 tcccacatag 130
      | |||||
Sbjct: 10  tgccacatag 1
```

Query= SNORA109\_NR\_132964.1 Length = 128 snoRNA-LBME-db  
Sbjct= #293 Length = 126 Blast

IP DYSK

Query: 14    aaaatatactatgaaagtggctttaatacc-ctgaagacacaatagctaagacccaaact    72



Query= SNORA40\_NR\_002973.1      Length = 127      snoRNA-LBME-db  
Sbjct= #310      Length = 141      [SnoReport/Blast](#)

Query= SNORA8\_NR\_002920.1      Length = 139      snoRNA-LBME-db  
Sbjct= #314      Length = 166      [SnoReport/Blast](#)

Query= SNORA48\_NR\_002918.1 Length = 135 snoRNA-LBME-db  
Sbjct= #315 Length = 134 Blast

Query= SNORA70B\_NR\_003707.2 Length = 134 snoRNA-LBME-db  
Sbjct= #319 Length = 107 Blast

no box defined yet

Query: 1 ggctcctggtgcttacc-acaggctgtgttcttacactgactgtatagaaagaggaggt 59  
 |||||  
 Sbjct: 142 ggctcctggtacttaccacaggctgcttcttacactggctgtacagaaagaggagct 83

Query: 60 agagtaaactacccatatacacctcagctcaggccctgtgcctggtctgtattgtgaa 119  
 |||||  
 Sbjct: 82 agagtaaactacctaatacacctcagcccaggccctgtgcctggtctgtattgtgaa 23

Query: 120 tggggg 125  
 |||||  
 Sbjct: 22 tggggg 17

no box defined yet

-----  
**Query= SNORA40\_NR\_002973.1** Length = 127 snoRNA-LBME-db  
**Sbjct= #321** Length = 141 [Blast](#)

Query: 12 atgtttttgtttaac--gtggacaaagacttacagatagggtgcaaaaaataaatcctctt 69  
 |||||  
 Sbjct: 127 atgtttttgcttaacttgtggataaagtcttacagacagggtgcaaaaaataaatcctctt 68

Query: 70 ttgcaaccagaactcattgttcagtatgagttttgatacatataagaaggacattt 127  
 |||||  
 Sbjct: 67 ttgcaaccagaactcattgttcagtatgagttttgatacatataagaaggatatta 10

-----  
**Query= SNORA10\_NR\_002327.1** Length = 133 snoRNA-LBME-db  
**Sbjct= #322** Length = 136 [SnoReport/Blast](#)

Query: 1 ggtctctcagctccgcttaaccacacgggtccagtgtgtgcttggcgtgttttcaggagg 60  
 |||||  
 Sbjct: 3 ggtctctcagctctgcttaaccacacgggtccagtgtgtgcttggcgtgttttcaggagg 62

Query: 61 gcagagaaaggctctcctaatgcacgacagaccgcccagaatggcctctctgttccttag 120  
 |||||  
 Sbjct: 63 gcagagaaaggctctcctaatgcacgacagaccgcccagaatggcctctctgttccttag 122

Query: 121 gagtgcgacaatt 133  
 |||||  
 Sbjct: 123 gagtgtgacaatt 135

-----  
**Query= SNORA70C\_NR\_003708.4** Length = 136 snoSeeker  
**Sbjct= #330** Length = 195 [SnoReport/Blast](#)

Query: 1 tctgcagccaattaagccaactgggttcctttcctcatggggggccattgtgcaatggct 60  
 |||||  
 Sbjct: 16 tctgcagccaattaagccaactgagttcctttccttggtggggggccagtgtgcaatggct 75

Query: 61 gcaaacagcagctttcttggtagtgtatgcagcctgtttgttgatgggttgctttaagg 120  
 |||||  
 Sbjct: 76 gcacacagcagcttccttggtagtgtacacagcctgttggttgatgggttgctctgagg 135

Query: 121 gaccatggaaacaggc 136  
 |||||  
 Sbjct: 136 gaccttggaacaggc 151

-----  
**Sbjct= #331** Length = 198 [SnoReport](#)

**IP FIB and Nucleolar localization**

C=11 D=66 17 96 GTGATGT 27 CTGA 82 0.93 C/D box snoRNA  
 TAAATTAACCCATTTATTACAGGCCA**GTGATGT**CTCAAAGAGTAGAGGAGCGTCTACTGGTCTTTCAACTCCTTCAGGCT

CTGATGGCGGACTTTACCGTGATAGCGGAGGTGGTATTGTATGTCCAGGCACCGCCAGCCACTGTCTTCACGCGGGAAC  
CACAGTGCCAGATCCCCGAGCTCATCTCTTCATCTTGG

-----  
Query= SNORA33\_NR\_002436.1 Length = 133 snoRNA-LBME-db  
Sbjct= #332 Length = 73 Blast

Query: 2 agccagccaatgaatctgcttacctgattgtgtttgtgcagacatactttaaaaactggc 61  
||||| || ||||||||||||||||||||||||||||||| ||| |||||||||||||  
Sbjct: 3 agccagtcagtgaatctgcttacctgattgtgtttgtgcagatatattttaaaaactggc 62  
  
Query: 62 aatagta 68  
| |||||  
Sbjct: 63 aatagta 69

Partial sequence; lack of ACA

-----  
Query= SNORA70B\_NR\_003707.2 Length = 134 snoSeeker  
Sbjct= #333 Length = 164 Blast

Query: 1 tgcagccaattaagctgactgaattcctttccttatgggggtccagtgtgcaatggctgt 60  
||||| ||||||||||||||||||||||||||| ||||| | |||||||||||||  
Sbjct: 161 tgcaaccaattaagctgactgaattcctttcctcccgggggccaggtgtgcaatggctgc 102  
  
Query: 61 aaacagcagcttccttggtagtgtatgcggcctgtttgtgtataggttgctctaagggga 120  
|| ||||| ||||||||||||||||||| | ||||||| ||||||| |||||||  
Sbjct: 101 aaacagcagcttccttggtagtgtacgcagcctgtttcctgtatgcgttgctctaagggga 42  
  
Query: 121 ccttggagacaggc 134  
||||||| |||||  
Sbjct: 41 ccttggagacaggc 28

-----  
Query= SNORA25\_NR\_003028.1 Length = 134 snoRNA-LBME-db  
Sbjct= #335 Length = 89 Blast

Query: 2 ggtca tttcaaagagggcttatgaggctgtgaaacccagagctc ttaacgctgtgaccaa 61  
||||| ||||||||| ||| ||||||||||||| ||||||| ||||| |||||  
Sbjct: 5 ggtca tttcaaagaggtcttgtgaggctgtgaaaccaagagctc ttaacactgcgaccaa 64  
  
Query: 62 agatggaagttctctataggaagcc 86  
||| ||||||||||||||||| |||  
Sbjct: 65 agatggaagttctctataggatgcc 89

-----  
Sbjct= #341 Length = 282 SnoReport  
IP DYSK and Nucleolar localization and splicing dependency

C=11 D=66 17 96 GTGATGT 27 CTGA 82 0.93 C/D box snoRNA  
CTCAGAGTGGTCAAGTTGAGTTGAAATCTCCTAAGTGTAAGTTGGGTGCTTTATGTTAAGCTACACTCTGGTTCGTCCAA  
GTGCACCTTTCCACTACACTTACCATGTTACGACTTGTTCCTCTATATAAATGCGTAGGGGTTTTAGTTAAATATCCTTT  
GAAGTATACTTGAGGAGGGTGACGGGCGGTGTGTATGCGCTTCAGGGCCCTGTTCAACTAAGCACTCTACACTTAGTTTA  
CTGCTAAATCCACCTTCGACCCTTAAATTCATAAGCTCCCT

-----  
Query= SNORA72\_NR\_002581.1 Length = 132 snoRNA-LBME-db  
Sbjct= #344 Length = 139 SnoReport/Blast

Query: 5 gaatattctcgctgttctgattttgtaatagtcaggacaggctaacattcgctatatta 64  
||||| ||||||||| ||||||||||||||| ||| ||| ||||| ||||| |||||  
Sbjct: 6 gaatattctcgctgttctgattttgtaataatcacgatgggctaacattcgcaatatta 65  
  
Query: 65 agaccatgcatgtgtcccaaacctagttccttccctaggtctggtttcataaatgctgg 124  
||||||| ||||| ||||| | ||||||||||||||| ||||||||||| |||||||||





-----  
**Sbjct= #357** Length = 68 [SnoReport](#)  
**IP FIB**

C=7 D=58 1 69 ATGATGG 7 CTGA 58 0.57 C/D box snoRNA  
GTCCTG**ATGATGG**TAGTCAAGACTGCACACTGTTGGTGTGCGGAGCATTTCCTCCCACT**CTGA**ATTGGGCT

-----  
**Query= SNORA27\_NR\_002575.1** Length = 126 snoRNA-LBME-db  
**Sbjct= #362** Length = 133 [SnoReport/Blast](#)

Query: 4 cccctttt**ctactttgc**cagttggacttatgtctttattg**gtcattca**agtggggcaaagg 63  
|||||  
Sbjct: 6 cccctg**ttcactttgc**caaatggatttggtgtctttattg**ctcatt**-aattggggcaaagg 64  
  
Query: 64 aaatatccttt**taaaactc**aggcaaactgggtgtttgtc-tg**tatcctgtc**agaggaaac 122  
|||||  
Sbjct: 65 aaatatccttt**taaaactc**aggcaaactgagtgtttgtcttg**tatcctgtc**agaggaaag 124  
  
Query: 123 aaat 126  
|||||  
Sbjct: 125 aaat 128

-----  
**Query= SNORA70C\_NR\_003708.4** Length = 136 snoSeeker  
**Sbjct= #363** Length = 164 [SnoReport/Blast](#)

Query: 1 tctgcagccaattaagccaactgggttcctttcctcatggggggccattgtgcaatggct 60  
|||||  
Sbjct: 2 tctgcagccaattaagccgactgagttcctttcctcatggggggccagtgtgcaatcgct 61  
  
Query: 61 gcaa**acagca**gctttccttggtagtgatgcagcctgtttgttgatgggttgctttaagg 120  
|||||  
Sbjct: 62 gcaa**acagca**gcttccttggtagtatatgcagcctgtttattgtacgggttgctctacgg 121  
  
Query: 121 gaccatggaa**acag**gc 136  
|||||  
Sbjct: 122 gaccttgag**acag**gc 137

-----  
**Query= SNORD28B\_NR\_145751.1** Length = 75 snoSeeker  
**Sbjct= #367** Length = 72 [Blast](#)

Query: 2 t**cagatga**tttgaattgataag**ctga**ggttct**gtgagga**atgacagttaagagcatgtta 61  
|||||  
Sbjct: 1 t**cagatga**tttgaattgataag**ctga**ggttct**gtgagga**atgacagttaagagcatgtta 60  
  
Query: 62 aagtt**gttatga** 73  
|||||  
Sbjct: 61 aagtt**gttatga** 72

-----  
**Query= SNORA63\_NR\_002586.1** Length = 135 snoRNA-LBME-db  
**Sbjct= #370** Length = 90 [Blast](#)

Query: 59 taaaataaagttgtttcttaa**ctatac**ctgtctgctattctcctgtagcagccagggacg 118  
|||||  
Sbjct: 7 taaaataaagttgtttcttaa**ctatac**ctgtctgctattctcctgtagcaaccagggatg 66  
  
Query: 119 **cttggtc**tcata**aca**tgt 135  
|||||  
Sbjct: 67 **attggtt**tcata**aca**tgt 83  
  
-----

Query= SNORA26\_NR\_003016.1 Length = 122 snoRNA-LBME-db  
Sbjct= #373 Length = 63 Blast

Query: 65 taaaaccca|gagaagagactggaaagctcctctt|tg|gatcctgtctggagtcaca| 119  
Sbjct: 5 taaaaccca|aagaagagattgtaaaacttctctt|tg|gatcctgtctggagtcaca| 59

Query= SNORA70B\_NR\_003707.2 Length = 134 snoSeeker  
Sbjct= #374 Length = 135 SnoReport/Blast

Query: 1 tgcagccaattaagctgactgaattcctttccttatgggggtccagtggtgcaatggctgt 60  
Sbjct: 3 tgcagccaattgagctgatggagttcctttcctcctggggc-c|cagtggtgcaaaagctgc 61  
Query: 61 aa|acagca|gcttccttggtagtgatgcggcctgtttgttgataggttgctctaaggga 120  
Sbjct: 62 aa|acagca|gcttccttggtagtgacgcagcctgtttcttatatgggttgctctaaggga 121  
Query: 121 ccttggag|acag| 132  
Sbjct: 122 ccttggag|acag| 133

Query= SNORA67\_NR\_002912.1 Length = 137 snoRNA-LBME-db  
Sbjct= #375 Length = 94 Blast

Query: 1 atccaaggtgat|tccctctcc|aaggggacat-cagtgcc--tctcagg|aaagtag|cagct 57  
Sbjct: 94 atccaaggggat|tccctctcc|aaggaacatgcagtgccctctcagg|aaagtaa|caacc 35  
Query: 58 tgga|ataga|aatctggcatgcctaaggcctttg 89  
Sbjct: 34 tgga|ataga|aatctggcatgcctaaggctctttg 3

Query= RNU6ATAC\_NR\_023344.1 Length = 105  
Sbjct= #378 Length = 125 Blast

Query 4 AAGGATGGTCAGATGCCACGAAGTAGGTGGCAATGCCTTA|ACTGTATGTGTGTTGTCAGG 63  
Sbjct 122 AACGATGGTTAGATGCCACGAAGTAGGTGGCAATGCCTTA|ACCGTATGCGTGTTGTCAGG 63  
Query 64 CTTGAGGGCCTCTTT|CATCCTTGTCAAGAGTTGTGCCAA 102  
Sbjct 62 CCCGAGGGCCTCTT|CATCCTTGTCAAGGGGAGTGCTAA 24

Query= SNORA72\_NR\_002581.1 Length = 132 snoRNA-LBME-db  
Sbjct= #379 Length = 64 Blast

Query: 1 ctgcgaat|attctcgct|gttctgattttgtaatagtcaggac|aggcta|aacattcgctat| 60  
Sbjct: 63 ctgccaat|attctcatt|gctctgattttgtaatagtcaggac|agccta|aacatttgctat| 4  
Query: 61 att 63  
Sbjct: 3 att 1

Query= SNORA40\_NR\_002973.1 Length = 127 snoRNA-LBME-db  
Sbjct= #380 Length = 141 Blast

Query: 1 tgcacttatgtatgtttttgtttaac--gtggacaaagacttacagataggtgcaaaaaa 58

```

|||||
Sbjct: 138 tgcacttatgtatgtttttgtttaaaactgtggacaaagacttatggataagtacaaaaa 79
Query: 59 taaatcctcttttgcaaccagaaactcattgttcagtatgagttttgatacatatagccag 119
|||||
Sbjct: 78 taaatcctcttttgcaaccagaaactcattgttcagtatgagttttaatacatataagaag 19
Query: 120 ggaaaatta 128
|||||
Sbjct: 18 ggatatta 10

```

-----  
**Query=** SNORA31B\_NR\_145985.1      Length = 134      snoRNA-LBME-db  
**Sbjct=** #381                      Length = 80              [Blast](#)

```

Query: 5 atctatttgacagacctggagcagttgctatctgctgctatggtttccaccacagatgca 64
|||||
Sbjct: 75 atctatttgacagacctggagcagttactgtctgctgctaaggtttccactacagatgca 16
Query: 65 ag 66
||
Sbjct: 15 ag 14

```

[Partial sequence; out of range](#)

-----  
**Query=** SNORA67\_NR\_002912.1      Length = 137      snoRNA-LBME-db  
**Sbjct=** #385                      Length = 63              [Blast](#)

```

Query: 79 taaggcctttggggaactgggatgcttatttcctctgccttccttggctgcc 130
|||||
Sbjct: 59 taaggctcttggggaacagggatgcttatttcctctgccttccttgtctgcc 8

```

[Partial sequence; out of range](#)

-----  
**Query=** SNORA48\_NR\_002918.1      Length = 135      snoRNA-LBME-db  
**Sbjct=** #386                      Length = 138              [Blast](#)

```

Query: 3 tccctgacctgggtagagtggcatctggttggtgatgcccatctcatatcagccaggac 62
|||||
Sbjct: 135 tccctgacctgggtagagtggcatccagttggtggtgcccatctcatatcagccaggac 76
Query: 63 aaagcaactccttgttcatcccagcttggcttttatccgtgcccatgcctggttcatgc 122
|||||
Sbjct: 75 aaagcaacccttgttcctcccagcttggcttttatctgtgcctatgcctggttcatgc 16
Query: 123 cttggacacat 133
|||||
Sbjct: 15 cttggacacat 5

```

-----  
**Query=** SNORD45B\_NR\_002748.1      Length = 71      snoRNA-LBME-db  
**Sbjct=** #391                      Length = 77              [Blast](#)

```

Query: 1 ggtcaatgatgtaatggcatgtattagctgaatctaaagttgatgtgagttctagaatta 60
|||||
Sbjct: 2 ggtcaatgatgtaatggcatgtattagctgaatccaaagttgaagtgaattctaaaatta 61
Query: 61 cac 63
|||
Sbjct: 62 cac 64

```

-----  
**Query=** SNORA40\_NR\_002973.1      Length = 127      snoRNA-LBME-db  
**Sbjct=** #392                      Length = 105              [Blast](#)
